# Supplementary material for: Comprehensive isolation of extracellular vesicles and nanoparticles
Source: Springer Nature journal article supplement (doi:10.1038/s41596-023-00811-0), 2023-03-13
Supplement: MOESM1 [file 41596_2023_811_MOESM1_ESM18.pdf]

## Reporting Summary

Nature Research wishes to improve the reproducibility of the work that we publish. This form provides structure for consistency and transparency in reporting. For further information on Nature Research policies, see our [Editorial Policies](#) and the [Editorial Policy Checklist](#).

Please do not complete any field with "not applicable" or n/a. Refer to the help text for what text to use if an item is not relevant to your study.

For final submission: please carefully check your responses for accuracy; you will not be able to make changes later.

### Statistics

For all statistical analyses, confirm that the following items are present in the figure legend, table legend, main text, or Methods section.

- | n/a                   | Confirmed                                                                                                                                                                                                                                                                                   |
|-----------------------|---------------------------------------------------------------------------------------------------------------------------------------------------------------------------------------------------------------------------------------------------------------------------------------------|
| <input type="radio"/> | <input checked="" type="radio"/> The exact sample size ( $n$ ) for each experimental group/condition, given as a discrete number and unit of measurement                                                                                                                                    |
| <input type="radio"/> | <input checked="" type="radio"/> A statement on whether measurements were taken from distinct samples or whether the same sample was measured repeatedly                                                                                                                                    |
| <input type="radio"/> | <input checked="" type="radio"/> The statistical test(s) used AND whether they are one- or two-sided<br><i>Only common tests should be described solely by name; describe more complex techniques in the Methods section.</i>                                                               |
| <input type="radio"/> | <input checked="" type="radio"/> A description of all covariates tested                                                                                                                                                                                                                     |
| <input type="radio"/> | <input checked="" type="radio"/> A description of any assumptions or corrections, such as tests of normality and adjustment for multiple comparisons                                                                                                                                        |
| <input type="radio"/> | <input type="radio"/>                                                                                                                                                                                                                                                                       |
| <input type="radio"/> | <input checked="" type="radio"/> A full description of the statistical parameters including central tendency (e.g. means) or other basic estimates (e.g. regression coefficient) AND variation (e.g. standard deviation) or associated estimates of uncertainty (e.g. confidence intervals) |
| <input type="radio"/> | <input checked="" type="radio"/> For null hypothesis testing, the test statistic (e.g. $F$ , $t$ , $r$ ) with confidence intervals, effect sizes, degrees of freedom and $P$ value noted<br><i>Give <math>P</math> values as exact values whenever suitable.</i>                            |
| <input type="radio"/> | <input checked="" type="radio"/> For Bayesian analysis, information on the choice of priors and Markov chain Monte Carlo settings                                                                                                                                                           |
| <input type="radio"/> | <input checked="" type="radio"/> For hierarchical and complex designs, identification of the appropriate level for tests and full reporting of outcomes                                                                                                                                     |
| <input type="radio"/> | <input checked="" type="radio"/> Estimates of effect sizes (e.g. Cohen's $d$ , Pearson's $r$ ), indicating how they were calculated                                                                                                                                                         |

*Our web collection on [statistics for biologists](#) contains articles on many of the points above.*

### Software and code

Policy information about [availability of computer code](#)

|                 |                                         |
|-----------------|-----------------------------------------|
| Data collection | N/A                                     |
| Data analysis   | Figures were made in Adobe Illustrator. |

For manuscripts utilizing custom algorithms or software that are central to the research but not yet described in published literature, software must be made available to editors and reviewers. We strongly encourage code deposition in a community repository (e.g. GitHub). See the Nature Research [guidelines for submitting code & software](#) for further information.

### Data

Policy information about [availability of data](#)

All manuscripts must include a [data availability statement](#). This statement should provide the following information, where applicable:

- Accession codes, unique identifiers, or web links for publicly available datasets
- A list of figures that have associated raw data
- A description of any restrictions on data availability

All data supporting the findings of this study can be found in the three supporting research papers or are available from the corresponding author upon reasonable request.

## Field-specific reporting

Please select the one below that is the best fit for your research. If you are not sure, read the appropriate sections before making your selection.

☒ Life sciences

☐ Behavioural & social sciences

☐ Ecological, evolutionary & environmental sciences

## Life sciences study design

All studies must disclose on these points even when the disclosure is negative.

|                 |                                                                                                                           |
|-----------------|---------------------------------------------------------------------------------------------------------------------------|
| Sample size     | Since this is a protocol that describes isolation of extracellular vesicles and particles, the sample size is irrelevant. |
| Data exclusions | No data was excluded from the studies.                                                                                    |
| Replication     | this protocol has been replicated many times.                                                                             |
| Randomization   | Since this is a protocol that describes isolation of extracellular vesicles and particles, randomization is irrelevant.   |
| Blinding        | Since this is a protocol, blinding is irrelevant.                                                                         |

## Behavioural & social sciences study design

All studies must disclose on these points even when the disclosure is negative.

|                   |  |
|-------------------|--|
| Study description |  |
| Research sample   |  |
| Sampling strategy |  |
| Data collection   |  |
| Timing            |  |
| Data exclusions   |  |
| Non-participation |  |
| Randomization     |  |

## Ecological, evolutionary & environmental sciences study design

All studies must disclose on these points even when the disclosure is negative.

|                          |  |
|--------------------------|--|
| Study description        |  |
| Research sample          |  |
| Sampling strategy        |  |
| Data collection          |  |
| Timing and spatial scale |  |
| Data exclusions          |  |
| Reproducibility          |  |
| Randomization            |  |
| Blinding                 |  |

Did the study involve field work? ☒ Yes ☐ No

## Field work, collection and transport

|                        |  |
|------------------------|--|
| Field conditions       |  |
| Location               |  |
| Access & import/export |  |
| Disturbance            |  |

## Reporting for specific materials, systems and methods

We require information from authors about some types of materials, experimental systems and methods used in many studies. Here, indicate whether each material, system or method listed is relevant to your study. If you are not sure if a list item applies to your research, read the appropriate section before selecting a response.

## Materials & experimental systems

|                                  |                               |
|----------------------------------|-------------------------------|
| n/a                              | Involved in the study         |
| <input checked="" type="radio"/> | Antibodies                    |
| <input checked="" type="radio"/> | Eukaryotic cell lines         |
| <input type="radio"/>            | Palaeontology and archaeology |
| <input type="radio"/>            | Animals and other organisms   |
| <input checked="" type="radio"/> | Human research participants   |
| <input type="radio"/>            | Clinical data                 |
| <input type="radio"/>            | Dual use research of concern  |

## Methods

|                       |                        |
|-----------------------|------------------------|
| n/a                   | Involved in the study  |
| <input type="radio"/> | ChIP-seq               |
| <input type="radio"/> | Flow cytometry         |
| <input type="radio"/> | MRI-based neuroimaging |

## Antibodies

|                 |                                                                                                                               |
|-----------------|-------------------------------------------------------------------------------------------------------------------------------|
| Antibodies used | The primary antibody used for immunoblot: Anti-TGFBI (10188-1-AP) was from Proteintech. Anti-AGO2 (clone EPR10411, ab186733). |
| Validation      | All the antibodies are commercially available and has been validated by the manufacturer.                                     |

## Eukaryotic cell lines

Policy information about [cell lines](#)

|                                                                      |                                                                                                                                 |
|----------------------------------------------------------------------|---------------------------------------------------------------------------------------------------------------------------------|
| Cell line source(s)                                                  | DiFi and SC cells were maintained in the Coffey lab, DKO-1 cells were obtained from Dr. T. Sasazuki at Kyushu University, Gli36 |
| Authentication                                                       | Cell lines were authenticated using short tandem repeat (STR) analysis.                                                         |
| Mycoplasma contamination                                             | All cell lines were tested negative for mycoplasma contamination.                                                               |
| Commonly misidentified lines<br>(See <a href="#">ICLAC</a> register) | No commonly misidentified cell lines were used.                                                                                 |

## Palaeontology and Archaeology

|                                                                                                                                                 |  |
|-------------------------------------------------------------------------------------------------------------------------------------------------|--|
| Specimen provenance                                                                                                                             |  |
| Specimen deposition                                                                                                                             |  |
| Dating methods                                                                                                                                  |  |
| <input type="checkbox"/> Tick this box to confirm that the raw and calibrated dates are available in the paper or in Supplementary Information. |  |
| Ethics oversight                                                                                                                                |  |

Note that full information on the approval of the study protocol must also be provided in the manuscript.

## Animals and other organisms

Policy information about [studies involving animals](#); [ARRIVE guidelines](#) recommended for reporting animal research

|                         |                                                                                                                                         |
|-------------------------|-----------------------------------------------------------------------------------------------------------------------------------------|
| Laboratory animals      | Male C57BL/6 mice (6-10 weeks old) were purchased from Jackson Laboratories.                                                            |
| Wild animals            | No wild animals were used in this study.                                                                                                |
| Field-collected samples | No field collected samples were used in this study.                                                                                     |
| Ethics oversight        | The animal experiments described in this study were carried out with the approval of Vanderbilt University Medical Center Institutional |

Note that full information on the approval of the study protocol must also be provided in the manuscript.

## Human research participants

Policy information about [studies involving human research participants](#)

|                            |                                                                                                                        |
|----------------------------|------------------------------------------------------------------------------------------------------------------------|
| Population characteristics | The human participants were listed in the original supporting research papers, and age and sex matched.                |
| Recruitment                | See details in the original supporting research papers                                                                 |
| Ethics oversight           | The study protocol was approved by the Vanderbilt University Medical Center Institutional Review Board (IRB#161529 and |

Note that full information on the approval of the study protocol must also be provided in the manuscript.

## Clinical data

Policy information about [clinical studies](#)

All manuscripts should comply with the ICMJE [guidelines for publication of clinical research](#) and a completed [CONSORT checklist](#) must be included with all submissions.

|                             |                                  |
|-----------------------------|----------------------------------|
| Clinical trial registration | registration number: NCT03263429 |
|-----------------------------|----------------------------------|

|                 |                                                                      |
|-----------------|----------------------------------------------------------------------|
| Study protocol  | clinicaltrial.gov                                                    |
| Data collection | Blood samples were collected at Vanderbilt University Medical Center |
| Outcomes        |                                                                      |

## Dual use research of concern

Policy information about [dual use research of concern](#)

### Hazards

Could the accidental, deliberate or reckless misuse of agents or technologies generated in the work, or the application of information presented in the manuscript, pose a threat to:

| No                    | Yes                                                         |
|-----------------------|-------------------------------------------------------------|
| <input type="radio"/> | <input checked="" type="radio"/> Public health              |
| <input type="radio"/> | <input checked="" type="radio"/> National security          |
| <input type="radio"/> | <input checked="" type="radio"/> Crops and/or livestock     |
| <input type="radio"/> | <input checked="" type="radio"/> Ecosystems                 |
| <input type="radio"/> | <input checked="" type="radio"/> Any other significant area |

### Experiments of concern

Does the work involve any of these experiments of concern:

| No                    | Yes                                                                                                          |
|-----------------------|--------------------------------------------------------------------------------------------------------------|
| <input type="radio"/> | <input checked="" type="radio"/> Demonstrate how to render a vaccine ineffective                             |
| <input type="radio"/> | <input checked="" type="radio"/> Confer resistance to therapeutically useful antibiotics or antiviral agents |
| <input type="radio"/> | <input checked="" type="radio"/> Enhance the virulence of a pathogen or render a nonpathogen virulent        |
| <input type="radio"/> | <input checked="" type="radio"/> Increase transmissibility of a pathogen                                     |
| <input type="radio"/> | <input checked="" type="radio"/> Alter the host range of a pathogen                                          |
| <input type="radio"/> | <input checked="" type="radio"/> Enable evasion of diagnostic/detection modalities                           |
| <input type="radio"/> | <input checked="" type="radio"/> Enable the weaponization of a biological agent or toxin                     |
| <input type="radio"/> | <input checked="" type="radio"/> Any other potentially harmful combination of experiments and agents         |

## ChIP-seq

### Data deposition

- ☐Confirm that both raw and final processed data have been deposited in a public database such as [GEO](#).
- ☐Confirm that you have deposited or provided access to graph files (e.g. BED files) for the called peaks.

|                                                        |             |
|--------------------------------------------------------|-------------|
| Data access links                                      | <div></div> |
| <i>May remain private before publication</i>           |             |
| Files in database submission                           | <div></div> |
| Genome browser session<br>(e.g. <a href="#">UCSC</a> ) | <div></div> |

### Methodology

|                         |             |
|-------------------------|-------------|
| Replicates              | <div></div> |
| Sequencing depth        | <div></div> |
| Antibodies              | <div></div> |
| Peak calling parameters | <div></div> |
| Data quality            | <div></div> |
| Software                | <div></div> |

## Flow Cytometry

## Plots

Confirm that:

- ☒ The axis labels state the marker and fluorochrome used (e.g. CD4-FITC).
- ☒ The axis scales are clearly visible. Include numbers along axes only for bottom left plot of group (a 'group' is an analysis of identical markers).
- ☐ All plots are contour plots with outliers or pseudocolor plots.
- ☒ A numerical value for number of cells or percentage (with statistics) is provided.

## Methodology

- Sample preparation
- Instrument
- Software
- Cell population abundance
- Gating strategy
- ☐ Tick this box to confirm that a figure exemplifying the gating strategy is provided in the Supplementary Information.

## Magnetic resonance imaging

### Experimental design

- Design type
- Design specifications
- Behavioral performance measures

### Acquisition

- Imaging type(s)
- Field strength
- Sequence & imaging parameters
- Area of acquisition
- Diffusion MRI ☒ Used ☐ Not used

### Preprocessing

- Preprocessing software
- Normalization
- Normalization template
- Noise and artifact removal
- Volume censoring

### Statistical modeling & inference

- Model type and settings
- Effect(s) tested
- Specify type of analysis: ☒ Whole brain ☐ ROI-based ☐ Both
- Statistic type for inference   
(See [Eklund et al. 2016](#) )
- Correction

### Models & analysis

- n/a ☐ Involved in the study
- ☒ Functional and/or effective connectivity
- ☒ Graph analysis
- ☒ Multivariate modeling or predictive analysis
- Functional and/or effective connectivity
- Graph analysis
- Multivariate modeling and predictive analysis
